# Supplementary material
Source: PubMed Central journal article supplement (PMC3380291)
Supplement: supp_46.6.823_Yang_ODS.pdf [file supp_46.6.823_Yang_ODS.pdf]

# **RGS5 inhibits bronchial smooth muscle contraction in severe asthma**

Zhao Yang, Nariman Balenga, Philip R.Cooper, Gautam Damera, Richard Edwards, Christopher E. Brightling, Reynold A. Panettieri, Jr, and Kirk M. Druey

## **Online Data Supplement**

## Supplemental Methods

### Mouse allergen challenge

6 12-week-old female BALB/c mice (Jackson Laboratories) were injected intraperitoneally with 20  $\mu$ g *Aspergillus fumigatus* (“Af”, Bayer Pharmaceuticals) together with 20 mg alum (Imject Alum, Pierce) in PBS (100  $\mu$ l) on Days 0 and 14, followed by intranasal challenge with either PBS + 21% glycerol (“naïve”) or 25  $\mu$ l Af extract in PBS (“Ag-challenged”) (3 mice in each group) on Days 25, 26, and 27 as previously described (22). All mice were sacrificed on day 28, 24 h after the last intranasal treatment. All mice used in this study were housed under pathogen-free conditions. The protocol (803093) was approved by the Institutional Animal Care and Use Committee of the University of Pennsylvania.

### Immunohistochemistry and imaging

For immunohistochemical staining of lung, sequential 2  $\mu$ m sections were cut from glycomethacrylate-embedded bronchial biopsies and stained using monoclonal antibodies against  $\alpha$ -smooth muscle actin (Dako, Ely, UK) and RGS5 (ProSci, Inc.) or appropriate isotype controls (Chicken IgY, Dako). RGS5<sup>+</sup> cells were enumerated/mm<sup>2</sup> ASM in the ASM bundle. A minimum area of 0.1 mm<sup>2</sup> was considered assessable as described previously (20). For staining of mouse lung, naïve and Af-challenged mice were anesthetized by ketamine and xylazine and euthanized by gentle cervical dislocation. Mice were perfused with PBS by intracardiac puncture followed by perfusion with 10% neutral buffered formalin for fixation and embedded in paraffin. 5  $\mu$ m sections were post-fixed in cold acetone and incubated with chicken anti-RGS5 antibody overnight at room temperature. Sections were then incubated with biotinylated anti-chicken

antibody (Dako) (1:500 for 30 min) followed by HRP-conjugated streptavidin (1:400; Dako) for 30 min. Slides were developed with DAB and counterstained with Hematoxylin. Images were obtained using a Leica DMI400 light microscope equipped with Retiga2000R camera (QImaging, Canada) and analyzed by QCapture™ software.

### **RNA isolation and quantitative RT-PCR**

Total RNA was isolated using the RNeasy Mini Kit (Qiagen) per the manufacturer's instructions. Total RNA (1 µg) was reverse transcribed into cDNA using SuperScript III First Strand Synthesis Kit (Invitrogen). Quantitative real-time PCR (qPCR) was performed with TaqMan gene expression assay probes. The 20 µl reaction contained 1× TaqMan Universal Master Mix, 1 µl specific gene or GAPDH gene expression assay probe (final primer concentration 900 nM), and 1 µl cDNA. The reactions were run for 2 min at 50°C, 10 min at 95°C, followed by 40 cycles of 15 s at 95°C and 1 min at 60°C. The average cycle threshold ( $C_t$ ) value from each RGS probe was applied to calculate specific gene expression and normalized by the human GAPDH  $C_t$  value. Results represent values from 7-11 individual donors assayed in duplicate.

### **Gene expression qPCR array**

Total RNA (1 µg) was reverse transcribed into cDNA using RT<sup>2</sup> First Strand Kit (SABiosciences). qPCR reaction cocktail consisted of RT<sup>2</sup> SYBR Green/ROX PCR Master Mix (SABiosciences) and pooled cDNAs derived from ASM of 7 healthy donors and 7 subjects with fatal asthma. Samples were analyzed with the Human GPCR Signaling Pathway Finder Array (SA Biosciences catalogue no. PAHS-071) using an ABI StepOnePlus thermal cycler (Applied

Biosystems) as follows: 1 cycle on 95°C, 10 min, followed by 40 cycles of 15 s at 95°C and 1 min at 60°C.

### **Measurement of intracellular $\text{Ca}^{2+}$ mobilization**

ASM cells ( $1 \times 10^4$  cells/well) were seeded in black clear bottom 96 well plates (Corning), allowed to attach overnight and serum-starved in Ham's F-12 medium for 24 h prior to measurement of intracellular  $\text{Ca}^{2+}$  concentration.  $\text{Ca}^{2+}$  indicator dye [FLIPR Calcium 3 Assay (Molecular Devices)] was added to each well followed by incubation for 1 h at 37°C with 5%  $\text{CO}_2$ . Serial dilutions of agonists [bradykinin, histamine, or thrombin (Sigma-Aldrich)] were prepared in a separate plate at 5x concentrations for robotic addition to cells by the FLEXStation II fluorimeter (Molecular Devices). Relative Fluorescence Units (RFUs) were measured every 1.5 sec for a period of 160 s after agonist addition. Results were plotted as the maximum–minimum signal for each agonist concentration over this time period, with the minimum signal defined as the stable baseline value prior to agonist addition. Graphs represent results (mean  $\pm$  S.E.M.) of 5 or more independent experiments using cells derived from separate individual donors.

### **Lentiviral amplification and transduction**

The human RGS5 coding sequence was amplified by PCR using pEGFP-RGS5 plasmid as a template and subcloned into pLenti7.3/V5 TOPO (Invitrogen). This construct or pLenti7.3/V5 TOPO-*LacZ* as a negative control was transfected into HEK293T cells together with a lentiviral packaging mix (Sigma) using Lipofectamine 2000. After 72 hr virus was harvested in the supernatant and concentrated 10-20-fold by centrifugation. Concentrated virus was added directly to human lung slices and gene expression and function were assayed 48 h after

transduction. Normal human ASM cells were incubated with lentivirus for 1 h at room temperature and then seeded in  $\text{Ca}^{2+}$  assay plates. Functional assays were performed 48 h post-transduction after overnight serum starvation.

### **Immunoblotting**

We prepared cell lysates in radioimmunoprecipitation (RIPA) lysis buffer supplemented with protease and phosphatase inhibitor cocktails (Roche). Antibodies were purchased from the following sources: Histamine H1 receptor, Adenosine A2a receptor,  $\text{G}\alpha_q$ , bradykinin B2 receptor (Santa Cruz);  $\text{PLC}\beta_1$  (BD Biosciences);  $\beta$ -arrestin 1/2, Akt1 (Cell Signaling Technology); PAR1 (R & D Systems); V5 (Invitrogen);  $\beta$ -actin (Sigma). For enhanced detection of RGS5, cell lysates were incubated with recombinant His<sub>6</sub>-G $\alpha_{il}$  (23) (750 ng) coupled to Ni/NTA agarose (Qiagen) essentially as described (24). After 2 washes with RIPA buffer, bead-associated proteins were resuspended in SDS sample buffer and analyzed by immunoblotting. We were unable to detect residual RGS5 in supernatants following G protein pulldown by immunoblotting, indicating that G $\alpha_{il}$  was present in excess relative to RGS5 (data not shown). Primary antibody staining was detected using near-infrared conjugated secondary antibodies and quantified with the LiCor Odyssey Imaging System (LiCor Biosciences).

### **PCLS contraction**

Lung slice contraction studies were performed on tissue from healthy, non-asthmatic donors as described previously (25).

## **Supplemental Figure Legends**

**Fig. E1 RGS5 antibody staining of mouse lung epithelium.** Immunohistochemical staining of lung sections from naïve mice was performed as in Fig. 7 using the indicated antibodies.

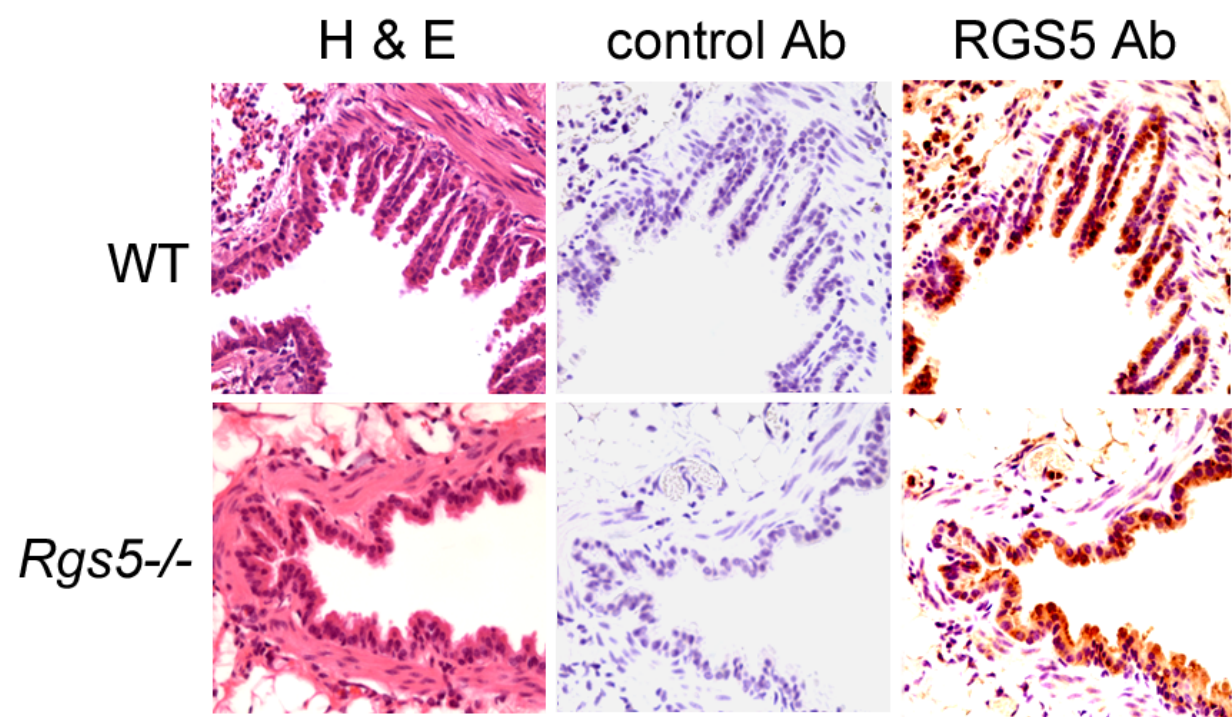

**Fig. E1**

## Supplemental Table

| <u>Gene</u><br><u>name</u> | <u>Fold change asthmatic v. control</u> |
|----------------------------|-----------------------------------------|
| Symbol                     | 1.506243421                             |
| ADCY5                      | 24.92200422                             |
| ADORA2A                    | -1.349630588                            |
| ADRB1                      | 2.212241559                             |
| ADRB2                      | 4.505917189                             |
| AGT                        | 7.022803962                             |
| AGTR2                      | 12.0870597                              |
| AGTRAP                     | 13.2572301                              |
| AKT1                       | 15.08571057                             |
| ARRB1                      | 14.60358839                             |
| ARRB2                      | 8.550017645                             |
| BAI1                       | 8.517378354                             |
| BCL2                       | 9.796769558                             |
| CALCR                      | 16.02694183                             |
| CALCRL                     | 6.357359293                             |
| CASR                       | 9.958172001                             |
| CCL2                       | 33.39987037                             |
| CCL4                       | 10.30203779                             |
| CCND1                      | 14.20792465                             |
| CCNE1                      | 10.46322603                             |
| CCNE2                      | 11.08719485                             |
| CDKN1A                     | 13.8845765                              |
| CDKN1B                     | 6.825967029                             |
| CFLAR                      | 11.29582718                             |
| COL1A1                     | 6.18343947                              |
| CRHR1                      | 4.655647733                             |
| CRHR2                      | 10.26953725                             |
| CTGF                       | 33.6564319                              |
| CYP19A1                    | 10.78379423                             |
| DRD1                       | 24.21077328                             |
| DRD2                       | 9.261400911                             |
| DUSP14                     | 16.24983688                             |
| S1PR1                      | 18.12582448                             |
| LPAR1                      | 20.32854849                             |
| S1PR3                      | 8.261419774                             |
| LPAR2                      | 9.292221885                             |
| S1PR2                      | 11.71817139                             |
| EDN1                       | 1.183455089                             |

|          |              |
|----------|--------------|
| EGR1     | 14.64513816  |
| ELK1     | 11.81832075  |
| ELK4     | 16.62044353  |
| FGF2     | -5.041155234 |
| FOS      | 12.33370049  |
| GALR2    | 24.69575719  |
| GCGR     | 8.930849577  |
| GNAQ     | 16.91221136  |
| GRM1     | -1.00919395  |
| GRM2     | 6.329951347  |
| GRM4     | 7.199114615  |
| GRM5     | 32.0457482   |
| GRM7     | 6.240781289  |
| ICAM1    | 13.56625538  |
| IL1B     | 16.42965295  |
| IL1R1    | 17.63855468  |
| IL1R2    | 12.56414426  |
| IL2      | 6.544766005  |
| JUN      | 2.534174201  |
| JUNB     | 2.678639376  |
| LHCGR    | 11.65112741  |
| MAX      | 61.1472901   |
| MMP9     | 3.939605977  |
| MYC      | 1.630848573  |
| NOS2     | 10.61688151  |
| OPRD1    | -1.020266977 |
| OPRK1    | 12.1918607   |
| PIK3CG   | 11.43829157  |
| PRKCA    | 14.74784387  |
| PTGDR    | 20.24700992  |
| PTGS2    | 18.54286877  |
| PTH1R    | 4.869412878  |
| RGS2     | 9.571622324  |
| RHO      | 6.616436203  |
| SCTR     | 9.569344805  |
| SERPINE1 | 8.55726642   |
| SOCS1    | 5.860162508  |
| TNF      | 27.48411882  |
| TSHR     | 21.618746    |
| UCP1     | 5.807292889  |
| VCAM1    | 15.64959073  |

|        |             |
|--------|-------------|
| VEGFA  | 10.23898683 |
| YWHAZ  | 2.008904316 |
| B2M    | 1.19296685  |
| HPRT1  | 1.111876981 |
| RPL13A | 1.073176158 |
| GAPDH  | 1.381787463 |
